# Supplementary material for: Medical Records Flag for Suicide Risk: Predictors and Subsequent Use of Care Among Veterans With Substance Use Disorders
Source: Atypon-hosted journal article supplement (doi:10.1176/appi.ps.201700545), 2018-06-08
Supplement: appi.ps.201700545.ds001.pdf [file appi.ps.201700545.ds001.pdf]

Online Supplemental Table 1. Demographic, clinical, and utilization predictors of suicide risk patient record flag initiation by gender (N = 474,946).

| Predictors                              | Women (n=21,614) |             |         | Men (n=453,332) |             |         |
|-----------------------------------------|------------------|-------------|---------|-----------------|-------------|---------|
|                                         | OR               | 95% CI      | p-value | OR              | 95% CI      | p-value |
| <b>Age</b>                              |                  |             |         |                 |             |         |
| <35                                     |                  |             |         |                 |             |         |
| 35-44                                   | 0.78             | 0.62 – 0.98 | 0.036   | 0.82            | 0.75 – 0.90 | <0.001  |
| 45-54                                   | 0.63             | 0.50 – 0.79 | <0.001  | 0.69            | 0.62 – 0.77 | <0.001  |
| 55-64                                   | 0.31             | 0.22 – 0.43 | <0.001  | 0.46            | 0.40 – 0.52 | <0.001  |
| 65+                                     | 0.25             | 0.11 – 0.57 | 0.001   | 0.29            | 0.24 – 0.35 | <0.001  |
| <b>Race</b>                             |                  |             |         |                 |             |         |
| White                                   |                  |             |         |                 |             |         |
| Black                                   | 0.85             | 0.69 – 1.04 | 0.115   | 0.61            | 0.54 – 0.68 | <0.001  |
| Other                                   | 1.11             | 0.80 – 1.52 | 0.534   | 0.92            | 0.82 – 1.02 | 0.128   |
| Unknown                                 | 0.96             | 0.64 – 1.45 | 0.864   | 0.78            | 0.65 – 0.93 | 0.007   |
| <b>Ethnicity</b>                        |                  |             |         |                 |             |         |
| Not Hispanic/Latino                     |                  |             |         |                 |             |         |
| Hispanic/Latino                         | 1.43             | 0.93 – 2.20 | 0.105   | 1.26            | 0.70 – 2.28 | 0.441   |
| Unknown                                 | 0.88             | 0.55 – 1.41 | 0.608   | 0.96            | 0.81 – 1.14 | 0.620   |
| <b>Marital Status</b>                   |                  |             |         |                 |             |         |
| Not Married                             |                  |             |         |                 |             |         |
| Married                                 | 1.05             | 0.86 – 1.29 | 0.614   | 1.07            | 1.01 – 1.13 | 0.026   |
| Unknown                                 | 1.80             | 0.79 – 4.08 | 0.162   | 0.89            | 0.61 – 1.28 | 0.514   |
| OEF/OIF                                 | 0.94             | 0.75 – 1.19 | 0.610   | 1.23            | 1.11 – 1.36 | <0.001  |
| Service Connected $\geq$ 50%            | 0.91             | 0.76 – 1.10 | 0.331   | 0.87            | 0.82 – 0.93 | <0.001  |
| Homeless Baseline                       | 1.14             | 0.95 – 1.38 | 0.163   | 1.22            | 1.10 – 1.36 | <0.001  |
| <b>Substance Use Diagnosis Baseline</b> |                  |             |         |                 |             |         |
| Alcohol Disorder                        | 1.18             | 0.96 – 1.44 | 0.107   | 1.02            | 0.95 – 1.10 | 0.517   |
| Cannabis Disorder                       | 1.02             | 0.81 – 1.28 | 0.889   | 1.00            | 0.94 – 1.07 | 0.977   |
| Cocaine Disorder                        | 1.16             | 0.94 – 1.43 | 0.178   | 1.36            | 1.22 – 1.52 | <0.001  |
| Amphetamine Disorder                    | 0.74             | 0.49 – 1.13 | 0.166   | 1.12            | 0.96 – 1.31 | 0.156   |
| Opioid Disorder                         | 1.31             | 0.98 – 1.76 | 0.068   | 1.17            | 1.07 – 1.27 | <0.001  |
| Sedative Disorder                       | 1.31             | 0.83 – 2.04 | 0.243   | 1.47            | 1.23 – 1.74 | <0.001  |
| Other Substance Use Disorder            | 0.87             | 0.71 – 1.08 | 0.212   | 0.98            | 0.90 – 1.07 | 0.638   |
| <b>Psychiatric Diagnosis Baseline</b>   |                  |             |         |                 |             |         |
| Depressive Disorder                     | 1.94             | 1.51 – 2.50 | <0.001  | 2.60            | 2.43 – 2.77 | <0.001  |
| Posttraumatic Stress Disorder           | 1.29             | 1.09 – 1.52 | 0.003   | 1.22            | 1.09 – 1.35 | <0.001  |
| Anxiety Disorder                        | 1.04             | 0.88 – 1.22 | 0.647   | 1.06            | 1.00 – 1.12 | 0.034   |
| Bipolar Disorder                        | 2.39             | 1.80 – 3.17 | <0.001  | 3.07            | 2.81 – 3.35 | <0.001  |
| Psychotic Disorder                      | 1.33             | 1.03 – 1.72 | 0.028   | 1.33            | 1.22 – 1.45 | <0.001  |

| Charlson Comorbidity Index Score*   |      |             |        |      |             |        |
|-------------------------------------|------|-------------|--------|------|-------------|--------|
| 0                                   |      |             |        |      |             |        |
| 1                                   | 1.23 | 1.02 – 1.48 | 0.029  | 0.99 | 0.93 – 1.05 | 0.741  |
| ≥2                                  | 1.24 | 0.87 – 1.76 | 0.227  | 1.08 | 1.00 – 1.17 | 0.046  |
| Pain-Related Diagnosis Baseline     | 0.94 | 0.77 – 1.15 | 0.542  | 1.09 | 1.04 – 1.14 | <0.001 |
| Suicide Attempt Diagnosis Baseline  | 6.18 | 4.54 – 8.42 | <0.001 | 5.68 | 4.91 – 6.56 | <0.001 |
| Acute Inpatient Admissions Baseline |      |             |        |      |             |        |
| Any Medical Admission               | 0.85 | 0.64 – 1.15 | 0.295  | 0.91 | 0.85 – 0.97 | 0.007  |
| Any Psychiatric Admission           | 1.21 | 0.88 – 1.66 | 0.244  | 1.23 | 1.11 – 1.37 | <0.001 |
| Any Substance Use Admission         | 1.04 | 0.67 – 1.62 | 0.852  | 1.02 | 0.91 – 1.15 | 0.740  |
| Outpatient Visits Baseline          |      |             |        |      |             |        |
| Any Primary Care Visit              | 0.55 | 0.43 – 0.70 | <0.001 | 0.51 | 0.47 – 0.55 | <0.001 |
| Any Mental Health Visit             | 1.47 | 1.06 – 2.05 | 0.023  | 1.52 | 1.35 – 1.70 | <0.001 |
| Any Substance Use Visit             | 0.72 | 0.58 – 0.90 | 0.003  | 0.84 | 0.77 – 0.92 | <0.001 |
| Any Emergency Department Visit      | 1.70 | 1.43 – 2.02 | <0.001 | 2.04 | 1.85 – 2.24 | <0.001 |
| constant                            | 0.02 | 0.01 – 0.03 | <0.001 | 0.01 | 0.01 – 0.01 | <0.001 |

*Notes.* ED = Emergency Department. OEF/OIF = Operation Enduring Freedom and Operation Iraqi Freedom; CI = Confidence Interval

\*Tiers reflect patients' total Charlson Comorbidity Index scores at baseline.
